# Supplementary material for: Paradigm ink with a temporally controllable processing-window for perovskite modules
Source: Royal Society of Chemistry journal article supplement (doi:10.1039/d2ta03437a), 2022-01-01
Supplement: d2ta03437a2.pdf [file d2ta03437a2.pdf]

## Supporting Information

### Paradigm Ink with Temporal-Controllable Processing-Window for Perovskite Module

Zihui Liang<sup>#1</sup>, Yuchen Hou<sup>#2</sup>, Yidong Ming<sup>1</sup>, Zhaoyang Wei<sup>1</sup>, Shashank Priya<sup>2</sup>,  
Kai Wang<sup>2\*</sup>, Congcong Wu<sup>1\*</sup>

<sup>1</sup> Key Laboratory for the Green Preparation and Application of Functional Materials,  
Hubei Key Laboratory of Polymer Materials, School of Materials Science and  
Engineering, Hubei University, Wuhan 430062, China

<sup>2</sup> Materials Science and Engineering, Penn State, University Park, PA 16802, United  
States

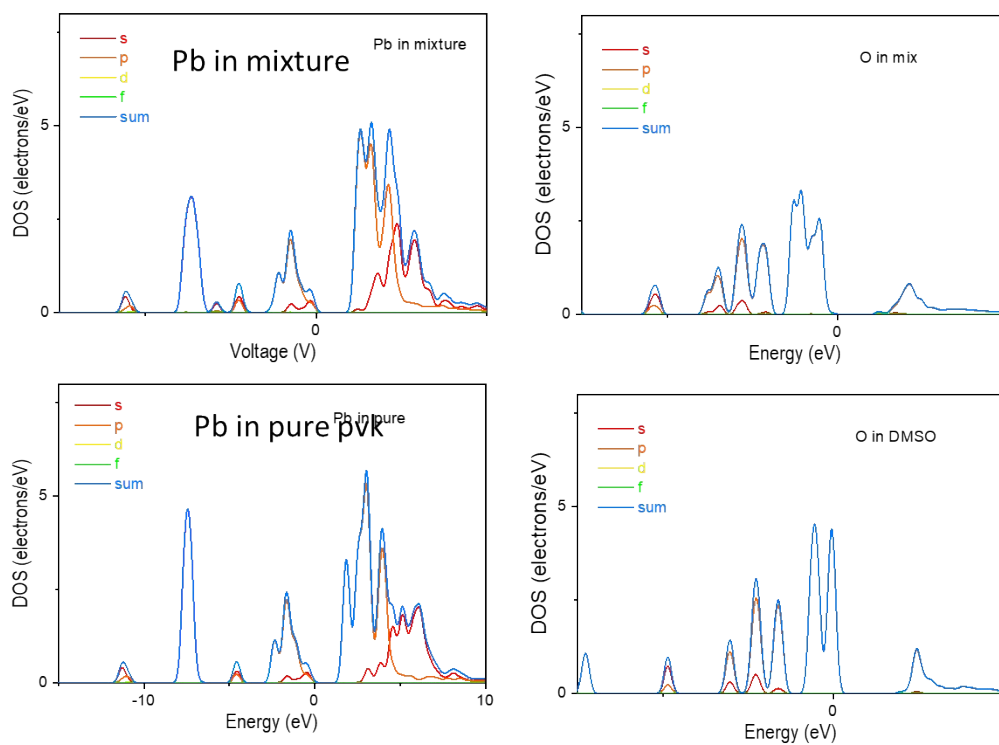

**Fig. S1.** The details of the density of state (DOS) of the Pb from the perovskite cluster and O from the DMSO.

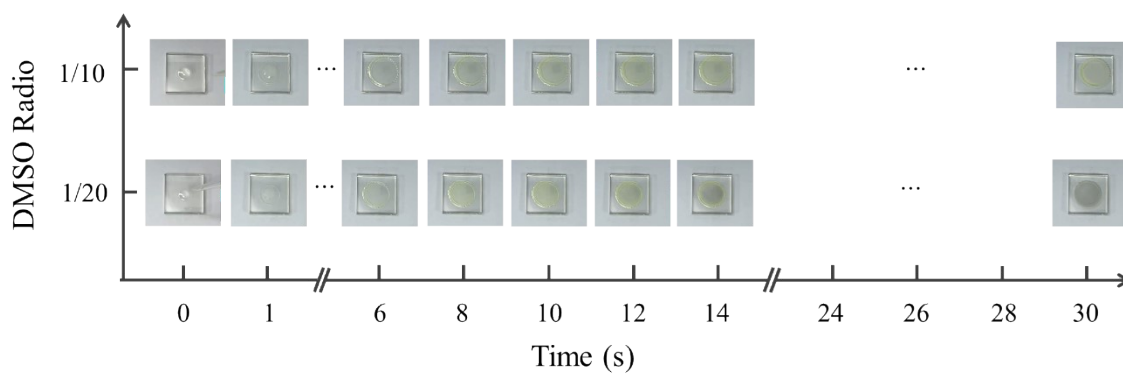

**Fig. S2.** Time evolution of perovskite droplet by drop casting the perovskite inks with DMSO ratio of 1/10 and 1/20 on FTO glass.

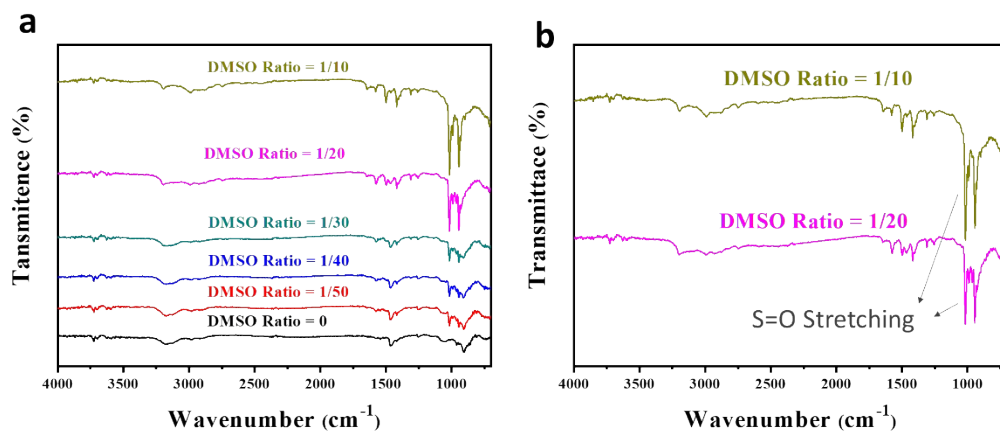

**Fig. S3.** (a) FTIR spectra of room temperature synthesized perovskite layers by inks of DMSO ratio of 0, 1/50, 1/40, 1/30, 1/20, and 1/10. (b) The magnified FTIR for DMSO ratio of 1/20 and 1/10.

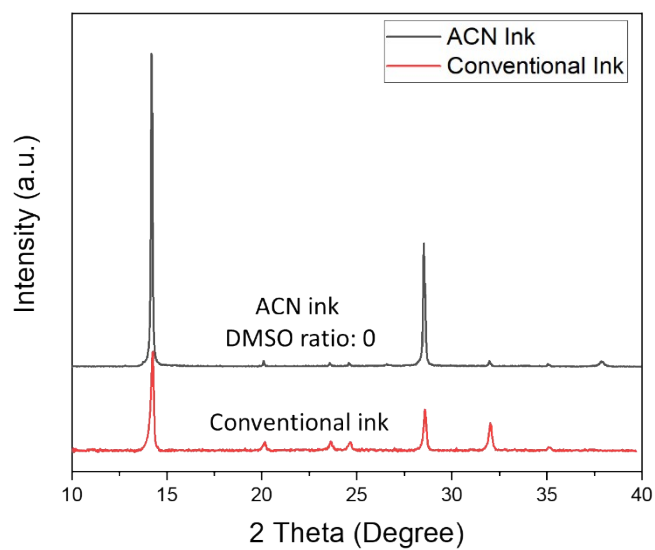

**Fig. S4.** The XRD patterns of perovskite layers fabricated by ACN ink and conventional ink.

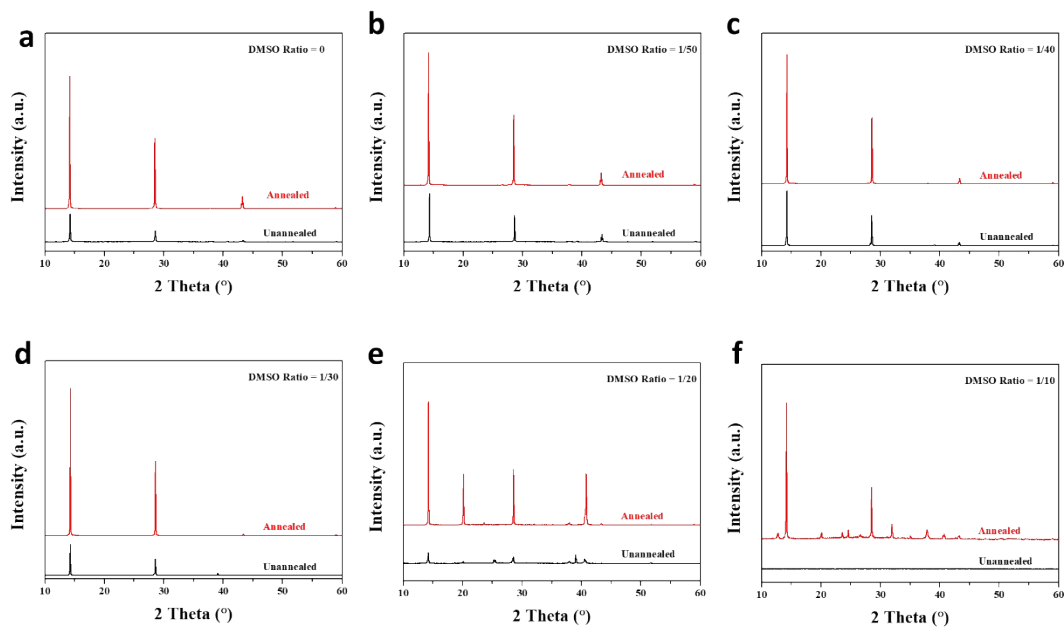

**Fig. S5.** Comparison of XRD patterns of perovskite layers with and without annealing process for the inks with DMSO ratio of 0, 1/50, 1/40, 1/30, 1/20, and 1/10.

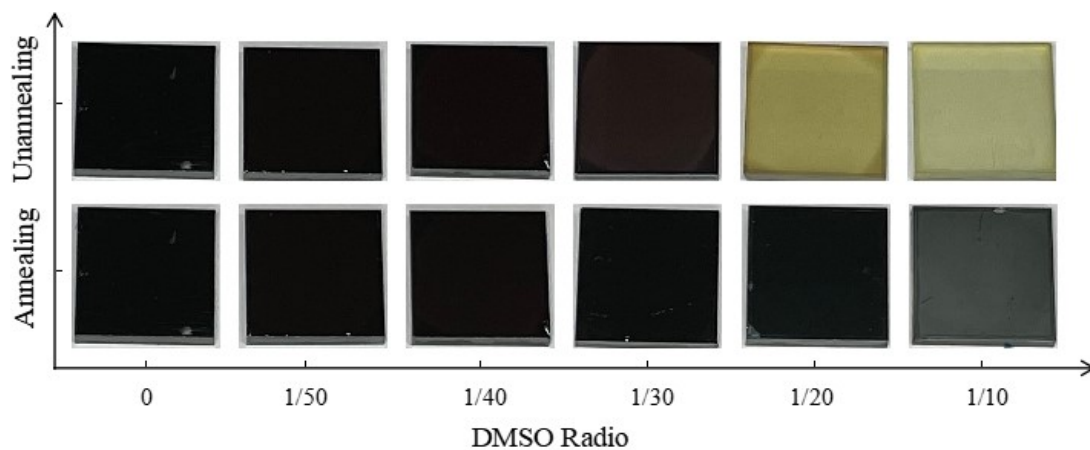

**Fig. S6.** The photographs of perovskite films with and without annealing process with DMSO ratio of 0, 1/50, 1/40, 1/30, 1/20, and 1/10.

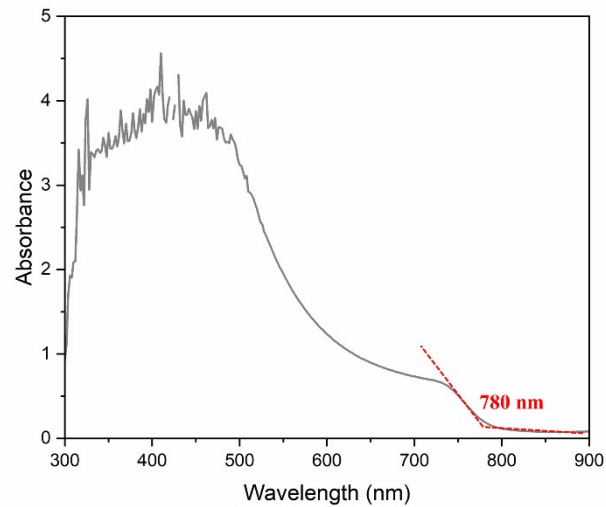

**Fig. S7.** UV-vis absorbance spectra of perovskite layer fabricated by the ACN ink.

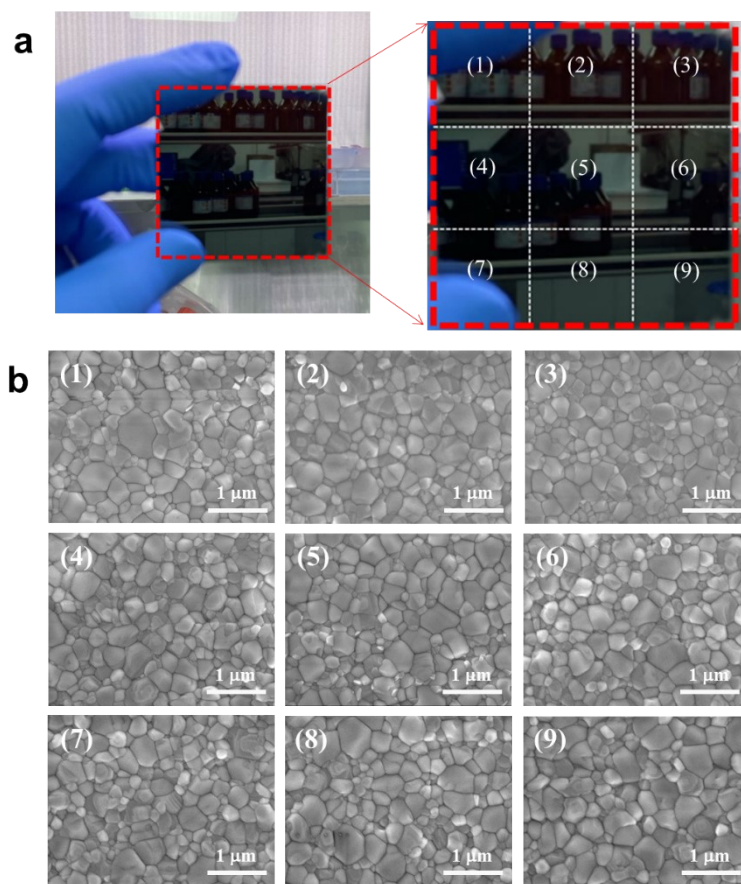

**Fig. S8.** (a) The photograph of the  $4 \times 4$  cm<sup>2</sup> large perovskite film that was divided into 9 individual subregions. (b) The SEM images of the 9 individual subregions in the large perovskite film.

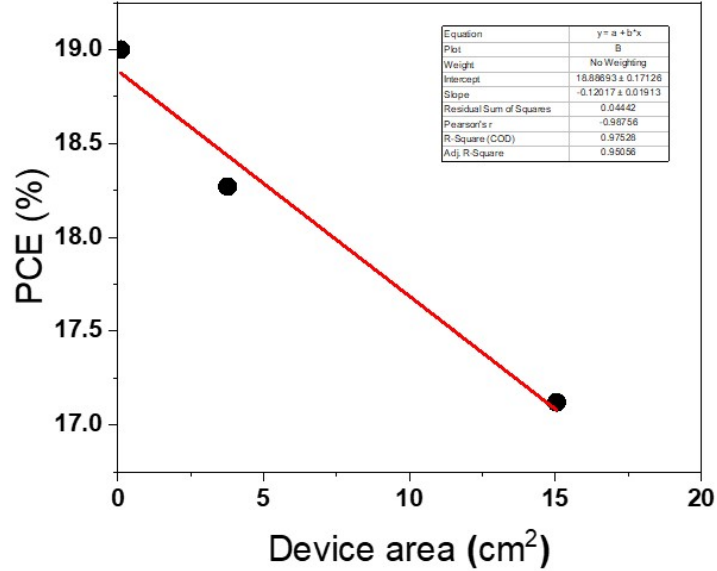

**Fig. S9.** The dependence of efficiencies with the active areas using the ACN-DMSO1/50 ink.

**Table S1.** Photovoltaic parameters of PSCs fabricated by DMSO ratio of 0, 1/50, 1/40, 1/30, 1/20 and 1/10.

| DMSO Ratio  | $J_{SC}$ (mA cm <sup>-2</sup> ) | $V_{OC}$ (V) | FF (%) | PCE (%) |
|-------------|---------------------------------|--------------|--------|---------|
| <b>0</b>    | 21.61                           | 1.17         | 0.76   | 19.14   |
| <b>1/50</b> | 21.44                           | 1.17         | 0.76   | 19.10   |
| <b>1/40</b> | 21.28                           | 1.17         | 0.76   | 19.06   |
| <b>1/30</b> | 20.36                           | 1.13         | 0.74   | 17.12   |
| <b>1/20</b> | 20.20                           | 1.13         | 0.65   | 14.89   |
| <b>1/10</b> | 20.06                           | 0.84         | 0.54   | 9.18    |
